# Supplementary material for: Subcutaneous Adipose Tissue Transcriptome Highlights Specific Expression Profiles in Severe Pediatric Obesity: A Pilot Study
Source: MDPI journal article supplement (doi:10.3390/cells12081105), 2023-04-07
Supplement: s1 [file s1]

**Table S2.** DEGs found in the following comparisons: OB vs NW, OW vs NW, and OB vs OW.

| Comparison | Gene name       | Coding | Log2FoldChange |
|------------|-----------------|--------|----------------|
| OB vs NW   | ZFAT            | +      | -3,103737829   |
| OW vs NW   | ENSG00000288900 | -      | -5,149906832   |
|            | ZFAT            | +      | -2,612986442   |
|            | OSR1            | +      | 1,718691559    |
| OB vs OW   | MTCO2P12        | -      | 3,380818979    |
|            | TPSAB1          | +      | 3,619902117    |
|            | CMA1            | +      | 4,821164022    |
|            | RPL31P57        | -      | 21,43006153    |
