# Supplementary material for: Subcutaneous Adipose Tissue Transcriptome Highlights Specific Expression Profiles in Severe Pediatric Obesity: A Pilot Study
Source: MDPI journal article supplement (doi:10.3390/cells12081105), 2023-04-07
Supplement: s1 [file s1]

**Table S1:** Summary statistics of reads mapping and transcripts assembly for each sample. The gray lines correspond to the sample excluded from further analyses.

| Sample | Number of<br>input reads | Uniquely<br>mapped reads<br>number | Uniquely<br>mapped reads % |
|--------|--------------------------|------------------------------------|----------------------------|
| SV_8   | 18932671                 | 13682788                           | 72.27%                     |
| SV_9   | 28959345                 | 21581279                           | 74.52%                     |
| OB_2   | 16771250                 | 12616970                           | 75.23%                     |
| OB_3   | 14348495                 | 10997336                           | 76.64%                     |
| OB_6   | 19272092                 | 14020704                           | 72.75%                     |
| OB_7   | 15458160                 | 11225717                           | 72.62%                     |
| OB_10  | 18062296                 | 12876346                           | 71.29%                     |
| OB_12  | 22963574                 | 139842                             | 0.61%                      |
| OB_15  | 12045660                 | 3431262                            | 28.49%                     |
| OB_26  | 20757470                 | 14650064                           | 70.58%                     |
| OW_1   | 22054804                 | 17095535                           | 77.51%                     |
| OW_4   | 19175098                 | 13745116                           | 71.68%                     |
| OW_21  | 31502049                 | 24334717                           | 77.25%                     |
| NW_5   | 28395344                 | 21422848                           | 75.44%                     |
| NW_16  | 19917439                 | 15292906                           | 76.78%                     |
| NW_18  | 23736169                 | 17803283                           | 75.00%                     |
| NW_20  | 19979054                 | 14781939                           | 73.99%                     |
| NW_22  | 28885675                 | 18505813                           | 64.07%                     |
| NW_23  | 12609668                 | 4884161                            | 38.73%                     |
| NW_25  | 30702039                 | 23283207                           | 75.84%                     |
