# Supplementary figures and images for: Subcutaneous Adipose Tissue Transcriptome Highlights Specific Expression Profiles in Severe Pediatric Obesity: A Pilot Study
Source: MDPI journal article supplement (doi:10.3390/cells12081105), 2023-04-07

**A**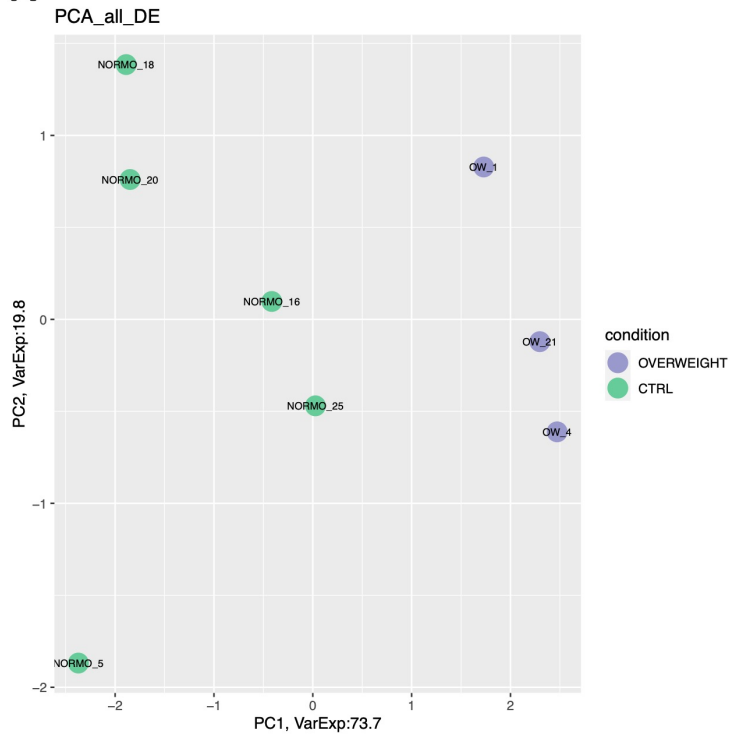**B**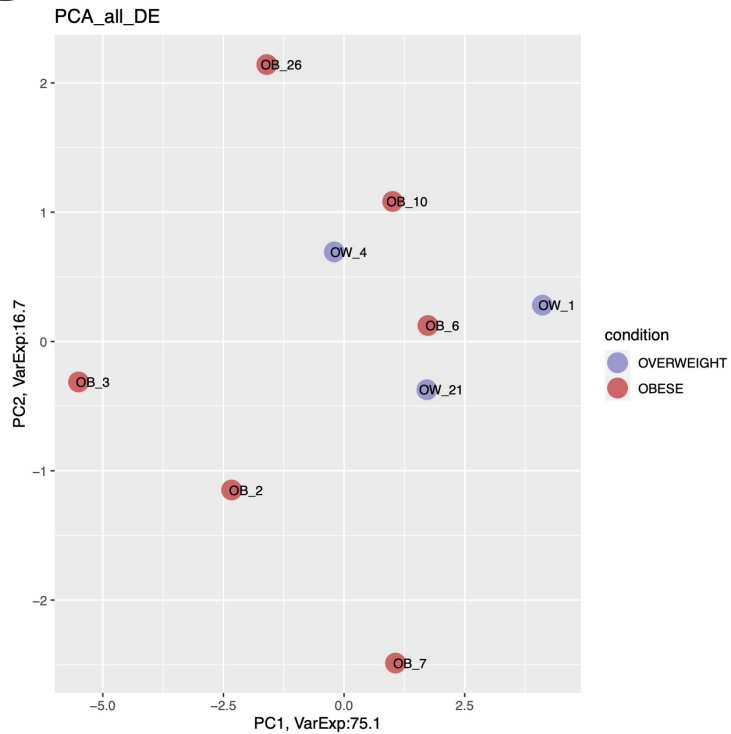

Supplement: s1 [file s1]

A

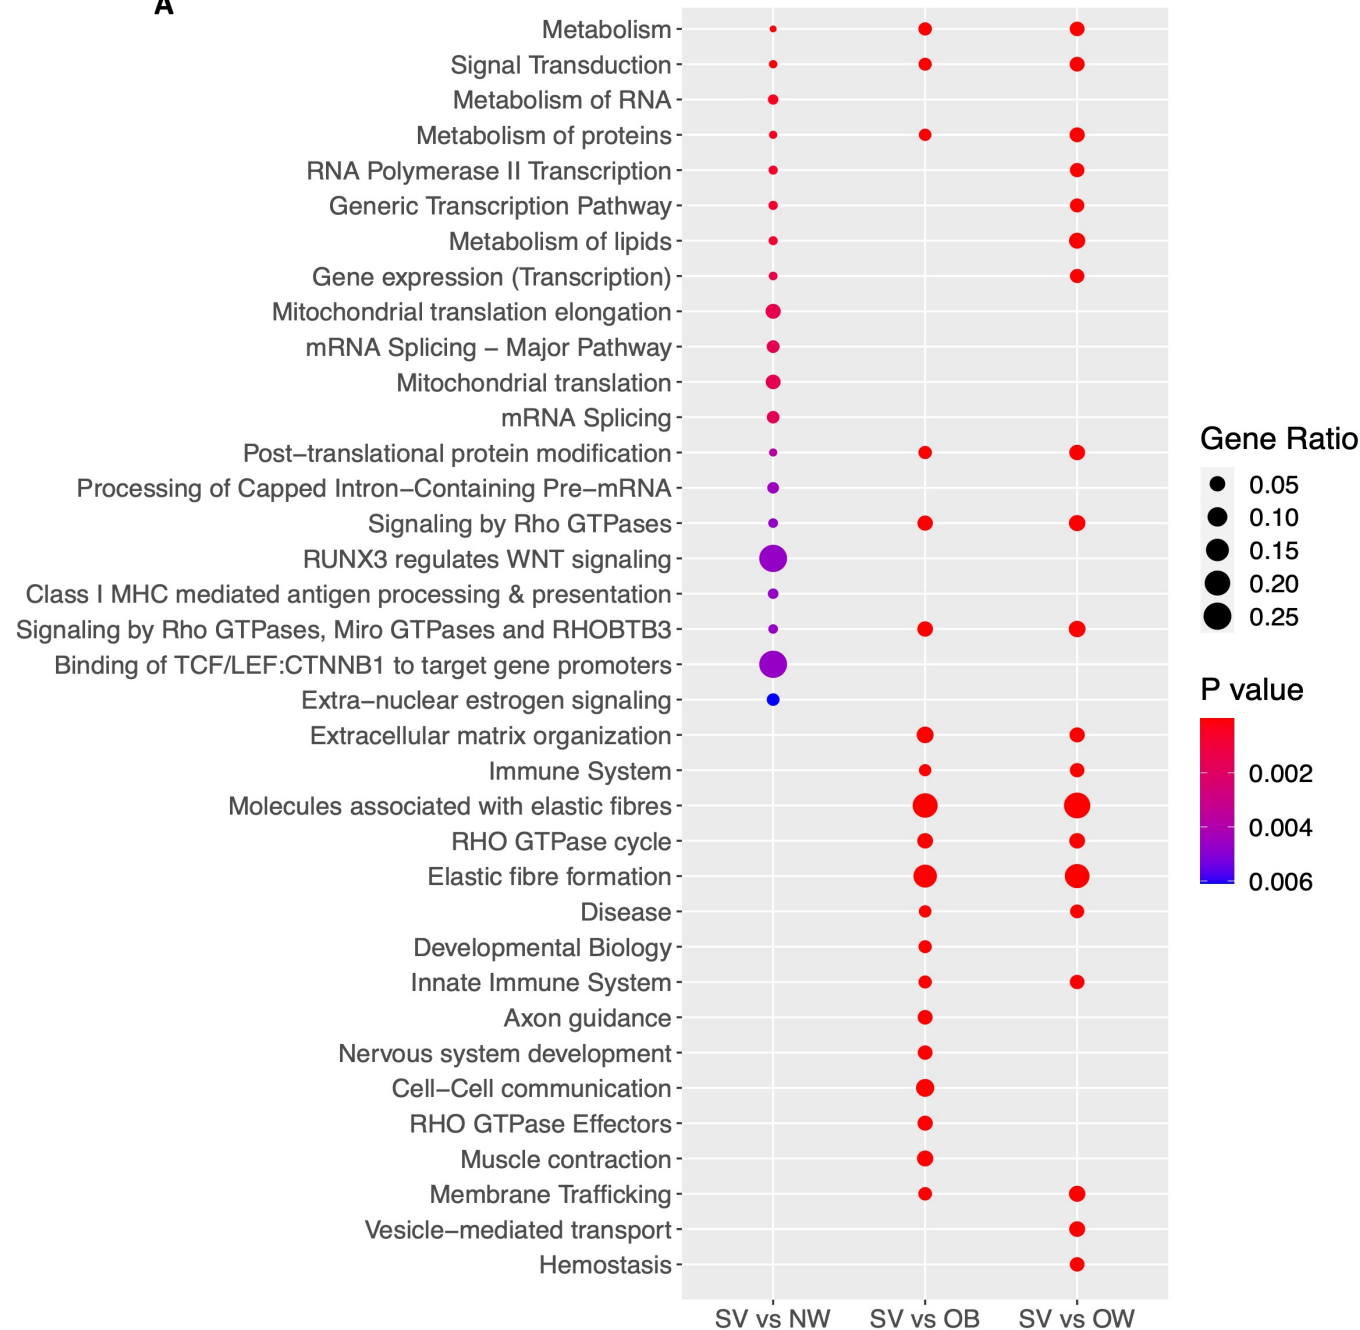

B

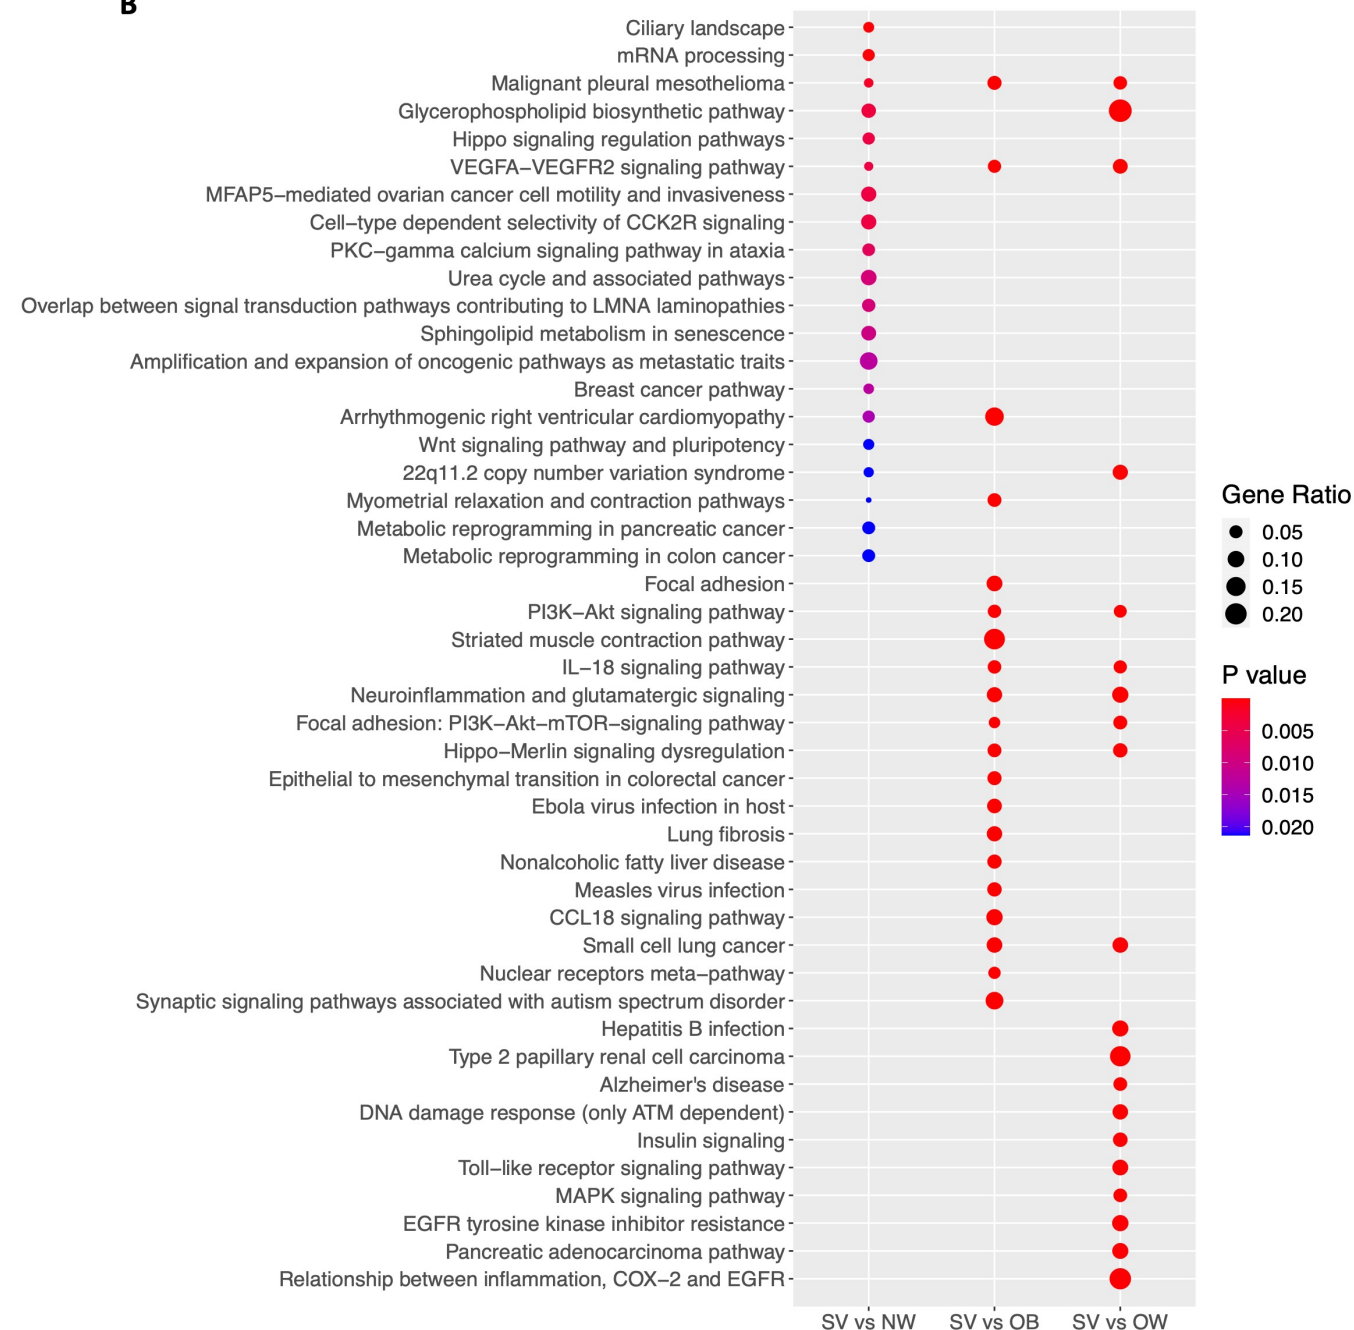

Supplement: s1 [file s1]

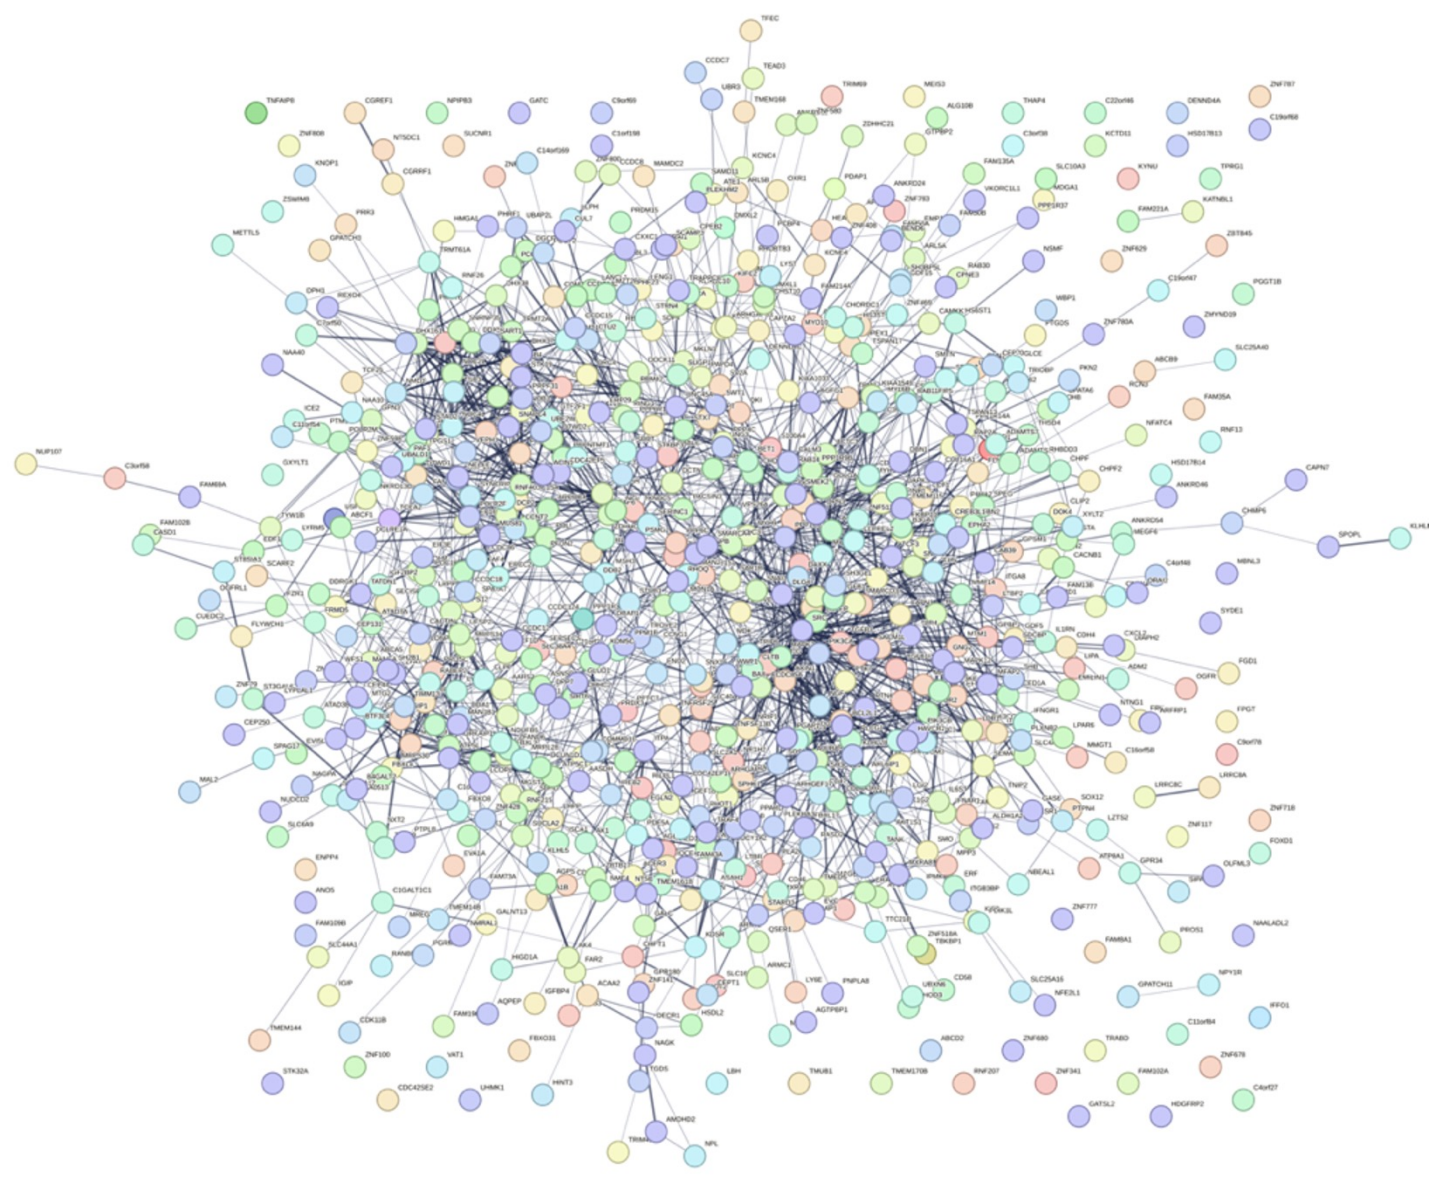

Supplement: s1 [file s1]
